# Supplementary material
Source: PubMed Central journal article supplement (PMC10323766)

## Supplementary Online Content

Tessler I, Albuissou J, Piñeiro-Sabarís R, et al. Association of the novel NOTCH pathway regulator *MIB1* gene with the development of bicuspid aortic valve. *JAMA Cardiol*. Published online July 5, 2023.  
doi:10.1001/jamacardio.2023.1469

**eTable 1.** List of 34 Genes Known or Suspected to Cause Syndromic and Nonsyndromic BAV

**eTable 3.** Detailed Information About the Microinjection Reagents and Genotyping of the Mice Model

**eTable 4.** Phenotyping of French and Israeli Cases From Discovery and Replication I Cohorts

**eTable 8.** Candidate Genes Identified After Multistep Variant and Gene Filtering

**eTable 9.** MIBAVA-Leducq Cohort (Belonging to Replication Cohort I) Characteristics

**eTable 10.** MIB1 Identified Coding Variants

**eTable 11.** MIB1 Association Study by Burden Testing Using gnomAD Control Population

**eTable 12.** Replication Cohort II—Summary of Demographics and Clinical Data of BAV Cases

**eTable 14.** The 5 Most Significant SNVs in the Common Variants Analysis

**eTable 15.** Risk Haplotypes at the MIB1 Locus: a Comparison Between BAV Cases and Controls

**eTable 16.** Results From the Combination of Missense Mib1 K735R Mutant Alleles With Notch1 Loss of Function mutations

**eFigure 1.** A Flow Chart Summarizing the Design of the Study

**eFigure 2.** Flow Chart Displaying the Prioritization Process for Candidate Genes and Variants Analysis

**eFigure 3.** Multidimensional Scaling (MDS) Plot for 452 BAV Cases and 1911 FHS Controls

**eFigure 4.** Pedigree of Family BAV-003 With MIB1 p.V943F Variant and Bicuspid Aortic Valve (BAV) Phenotype

**eFigure 5.** Histological Analysis of Mib1<sup>+/+</sup>, Mib1<sup>+/+</sup>;Notch1<sup>+/+</sup> and Mib1<sup>+/+</sup>;Rbp<sup>+/+</sup> Control Mice

This supplementary material has been provided by the authors to give readers additional information about their work.

**eTables**

**eTable 1: List of 34 genes known or suspected to cause syndromic and non-syndromic BAV**

OMIM: Online Mendelian Inheritance in Man; AV, aortic valve; AD, autosomal dominant;

AR, autosomal recessive; NA, not applicable

| Gene in...<br>(if present) | BAV          | OMIM #           | OMIM phenotype                                                | Inheritance in humans |
|----------------------------|--------------|------------------|---------------------------------------------------------------|-----------------------|
| <i>ACTA2</i>               | NA           | 611788           | Aortic aneurysm, familial thoracic 6                          | AD                    |
| <i>Acvr1</i>               | Mouse        | NA               | NA                                                            | NA                    |
| <i>BGN</i>                 | Human        | 300989           | Meester-Loeys syndrome                                        | NA                    |
| <i>ELN</i>                 | NA           | 185500           | Supravalvular aortic stenosis                                 | NA                    |
| <i>FBN1</i>                | NA           | 154700           | Marfan syndrome                                               | NA                    |
| <i>FLNA</i>                | Human        | 300049           | Periventricular nodular heterotopia 1                         | XLD                   |
| <i>Fn1</i>                 | Mouse        | 184255           | Spondylometaphyseal dysplasia, corner fracture type           | NA                    |
| <i>Gata4</i>               | Mouse        | 607941           | Atrial septal defect 2                                        | AD                    |
| <i>Gata5</i>               | Mouse        | 617912           | Congenital heart defects, multiple types, 5                   | NA                    |
| <i>Gata6</i>               | Mouse        | 600001           | Heart defects, congenital, and other congenital anomalies     | AD                    |
| <i>LOX</i>                 | NA           | 617168           | Aortic aneurysm, familial thoracic 10                         | AD                    |
| <i>MAT2A</i>               | Human        | 607086           | Aortic aneurysm, familial thoracic 1                          | AD                    |
| <i>Matr3</i>               | Mouse        | NA               | NA                                                            | NA                    |
| <i>MFAP5</i>               | NA           | 616166           | Aortic aneurysm, familial thoracic 9                          | AD                    |
| <i>MYH11</i>               | NA           | 132900           | Aortic aneurysm, familial thoracic 4                          | AD                    |
|                            |              | 108900           | Atrial septal defect 7, with or without AV conduction defects | AD                    |
| <i>Nkx2.5</i>              | Mouse        | 217095           | Conotruncal heart malformations, variable                     | AD                    |
|                            |              | 614435           | Hypoplastic left heart syndrome 2                             | AD                    |
|                            |              | 187500           | Tetralogy of Fallot                                           | AD                    |
|                            |              | 614432           | Ventricular septal defect 3                                   | AD                    |
| <i>Nos3</i>                | Mouse        | NA               | NA                                                            | NA                    |
| <i>NOTCH1</i>              | Human, Mouse | 109730           | Aortic valve disease 1                                        | AD                    |
| <i>PRKG1</i>               | NA           | 615436           | Aortic aneurysm, familial thoracic 8                          | AD                    |
| <i>Robo1</i>               | Mouse        | NA               | NA                                                            | NA                    |
| <i>Robo2</i>               | Mouse        | NA               | NA                                                            | NA                    |
| <i>ROBO4</i>               | Human        | 607528           | Aortic valve disease 8                                        | AD                    |
| <i>SKI</i>                 | NA           | 182212           | Shprintzen-Goldberg craniosynostosis syndrome                 | AD                    |
| <i>SKIL</i>                | NA           | NA               | NA                                                            | NA                    |
| <i>SLC2A10</i>             | NA           | 208050           | Arterial tortuosity syndrome                                  | AR                    |
| <i>SMAD2</i>               | NA           | NA               | NA                                                            | NA                    |
| <i>Smad3</i>               | Mouse        | 613795           | Loeys-Dietz syndrome 3                                        | AD                    |
| <i>SMAD6</i>               | Human        | 614823           | Aortic valve disease 2                                        | AD                    |
| <i>TGFB2</i>               | Human        | 614816           | Loeys-Dietz syndrome 4                                        | AD                    |
| <i>TGFB3</i>               | Human        | 615582           | Loeys-Dietz syndrome 5                                        | AD                    |
| <i>TGFBR1</i>              | Human        | 609192<br>610168 | Loeys-Dietz syndromes 1&2                                     | AD                    |
| <i>TGFBR2</i>              | Human        | 609192<br>610168 | Loeys-Dietz syndromes 1&2                                     | AD                    |
| <i>TGFBR3</i>              | NA           | NA               | NA                                                            | NA                    |
| <i>YYIAP1</i>              | Human        | 602531           | Grange syndrome                                               | AR                    |

89 **eTable 3: Detailed information about the microinjection reagents and genotyping of the**  
 90 **mice model**

91 **(a) CRISPR-Cas9**

| Organism and Genetic line | Type     | Genomic target     | Sequence (5' - 3')                                                                                                                     | bp    |
|---------------------------|----------|--------------------|----------------------------------------------------------------------------------------------------------------------------------------|-------|
| Mouse, <i>Mib1</i> K735R  | tracrRNA | <i>Mib1</i> Exon15 | AGCAUAGCAAGUUAAAAUAAGGCUAGUCCGUUAUCAACUUGAAAAAGUGGCACCG<br>AGU CGGUGCUUU                                                               | 67 bp |
|                           | crRNA    | <i>Mib1</i> Exon15 | GGGCAAGGUAGACGCUGCCUGUUUUAGAGCUAUGCU                                                                                                   | 36 bp |
|                           | ssODN    | <i>Mib1</i> Exon15 | CAAATCAGATGCAGAAGAAATATAAACTTGCTTCCACTAGTAGTGAGAGGACATTATCT<br>TTACTTACTGTGTTTCTTGAAGGTTCCCAAGCGGCATCGACCTTGCCACATCTTGCA<br>TGTC TTGTA | 127bp |

92

93 **(b) Microinjection summary**

| Organism and Genetic line | [Cas9 protein] (ng/uL) | [crRNA] (ng/μL) | [ssODN] (ng/μL) | Viable E2C embryos | Transferred embryos | Females | Born | Weaned | Mutant | Founders |
|---------------------------|------------------------|-----------------|-----------------|--------------------|---------------------|---------|------|--------|--------|----------|
| Mouse, <i>Mib1</i> K735R  | 20                     | 0.61            | 10              | 100                | 100                 | 4       | 24   | 22     | 4      | 1        |

94

95 **(c) Primers Genotyping**

| Organism and Genetic line | Gene                  | Primer sequence (5' - 3')   | Annealing temperature | Amplicon (bp) |
|---------------------------|-----------------------|-----------------------------|-----------------------|---------------|
| Mouse, <i>Mib1</i> K735R  | <i>Mib1</i> K735R WT  | For: ATGTGGGCAAGGTAGACGCT   | 53.9°C                | 497bp         |
|                           |                       | Rev: ATTAGAAGAAAACAAACGACC  |                       |               |
|                           | <i>Mib1</i> K735R Mut | For: GGCACACGATGAAATAATCAGT | 55.4°C                | 329bp         |
|                           |                       | Rev: TTCTTGAAGGTTCCCAAGCG   |                       |               |

96

97

98 **eTable 4: Phenotyping of French and Israeli cases from Discovery and Replication I cohorts**

|                         | French cases (n=210) | Israeli cases (n=81) |
|-------------------------|----------------------|----------------------|
| <b>Valve morphology</b> |                      |                      |
| Type I (R-L)            | 130 (61.9%)          | 38 (53.5%)           |
| Type II (R-Non)         | 21 (10.0%)           | 14 (19.7%)           |
| Type III (L-Non)        | 0 (0.0%)             | 6 (8.45%)            |
| Type 0 (unicuspid)      | 19 (9.0%)            | 12 (16.9%)           |
| Two raphe               | 5 (2.4%)             | 1 (1.4%)             |
| <b>Aortic disease</b>   |                      |                      |

|                    |             |            |
|--------------------|-------------|------------|
| Aortic dilatation* | 117 (55.7%) | 29 (41.1%) |
| Aortic coarctation | 28 (13.3%)  | 7 (8.6%)   |

Data is presented in n (%), unless other specified; \*Dilatation of the ascending aorta: adults $\geq$ 40mm, child $\geq$ 2 Z score; Individual patient data can be found in eTables 4 and 5

**eTable 8: Candidate genes identified after multi-step variant and gene filtering.**

Details are provided on global population frequencies, CADD pathogenicity scores, and corresponding pedigrees. All variants are described according to the HGVS nomenclature.

|                                        |                                  | <b>HGVS<br/>Coding<br/>variant</b> | <b>HGVS<br/>nomenclature</b> | <b>gnomAD<br/>frequency<br/>(v2.1.1)</b> | <b>CADD<br/>score<br/>v1.6</b> |
|----------------------------------------|----------------------------------|------------------------------------|------------------------------|------------------------------------------|--------------------------------|
| <b>CHD<br/>genes</b>                   | <b><i>MIB1</i></b><br>NM_020774  | c.2827G>T                          | p.V943F                      | 0.00016                                  | 23.2                           |
|                                        | <b><i>JAG1</i></b><br>NM_000214  | c.2884A>G                          | p.T962A                      | 0.00008354                               | 25.9                           |
|                                        | <b><i>JAG1</i></b><br>NM_000214  | c.925G>C                           | p.G309R                      | 0.000003978                              | 24                             |
|                                        | <b><i>NCOR2</i></b><br>NM_006312 | c.3698C>T                          | p.T1233M                     | 0.0005768                                | 25.8                           |
| <b>Cardiac<br/>expressed<br/>Genes</b> | <b><i>NID2</i></b><br>NM_007361  | c.3979C>T                          | p.H1327Y                     | 0.0005162                                | 22.9                           |
|                                        | <b><i>NID2</i></b><br>NM_007361  | c.3248C>T                          | p.A1083V                     | 0.0008252                                | 25.6                           |

For each candidate gene, one variant per family was identified.

CHD: congenital heart defect; HGVS, Human Genome Variation Society.

117

118

119 **eTable 9: MIBAVA-Leducq cohort (belonging to Replication Cohort I) characteristics**

120

121

122

123

124

125

126

127

128

129

130

131

| Variable                                              | Status                                                                |
|-------------------------------------------------------|-----------------------------------------------------------------------|
| Age                                                   | 52.18 years ±11.84 years (SD)                                         |
| Sex                                                   | 35% Male (70/195)<br>9%Female (17/195)<br>56% unknown (112/195)       |
| Family history of BAV and/or Thoracic aortic aneurism | 4% Positive (8/195)<br>35% Negative (70/195)<br>61% Unknown (121/195) |

132 eTable 10: MIB1 identified coding variants

| Variant class    | Coding variant         | Proteic variant | gnomAD Frequency (v2.1.1) | Ethnic background | CADD score (v1.6) | Domain |
|------------------|------------------------|-----------------|---------------------------|-------------------|-------------------|--------|
| Missense         | c.1138G>A              | p.D380N         | 0                         | NFE               | 26                | REP1   |
|                  | c.1771A>T              | p.I591F         | 0.00013                   | NFE               | 22.8              | ANK    |
|                  | c.2204A>G              | p.K735R         | 0.000008                  | NFE               | 24                | ANK    |
|                  | c.2411G>A <sup>a</sup> | p.R804Q         | 0.00033                   | NFE               | 23.1              | RING   |
|                  | c.2827G>T              | p.V943F         | 0.00016                   | ASJ               | 23.2              | RING   |
| Loss of function | c.289C>T               | p.R97*          | 0.00005                   | ASJ               | 36                | -      |
|                  | c.2305C>T              | p.R769*         | 0.00004                   | NFE               | 39                | -      |
|                  | c.3001C>T              | p.R1001*        | 0.00004                   | NFE               | 38                | -      |

133<sup>a</sup>Found in 2 index cases.

134

**eTable 11: MIB1 association study by burden testing using gnomAD control population**

137

|                                | CASES             |                     |                       | GnomAD CONTROLS   |                     |                       | p-value |
|--------------------------------|-------------------|---------------------|-----------------------|-------------------|---------------------|-----------------------|---------|
|                                | Ethnic background | Total alleles count | Variant alleles count | Ethnic background | Total alleles count | Variant alleles count |         |
| Rare protein altering variants | NFE+ASJ           | 892                 | 9                     | any               | 251,496             | 1230                  | 0.03    |
|                                | NFE+ASJ           | 892                 | 9                     | NFE+ASJ           | 123,850             | 579                   | 0.03    |
| Synonymous variants            | NFE+ASJ           | 892                 | 1                     | any               | 251,496             | 1446                  | 0.99    |
|                                | NFE+ASJ           | 892                 | 1                     | NFE+ASJ           | 123,850             | 414                   | 0.95    |

138

Burden analysis was performed using TRAPD which is based on allelic frequencies. The allelic frequencies presented correspond to half of genotype and disease frequencies in the context of a dominantly inherited disease as BAV.

141



**eTable 12. Replication cohort II – Summary of demographics and clinical data of BAV cases**

|                         | <b>BAV cases (n=452)</b> |
|-------------------------|--------------------------|
| Sex (male)              | 74.3% (336/452)          |
| Age (years, mean±SD)    | 54.4±11.8                |
| <b>Valve morphology</b> |                          |
| Type I (R-L)            | 50.1% (230/452)          |
| Type II (R-Non)         | 13.7% (62/452)           |
| Type III (L-Non)        | 2.2% (10/452)            |
| Unknown                 | 33.2% (150/452)          |
| <b>Aortic disease</b>   |                          |
| Aortic coarctation      | 1.1% (5/452)             |
| Aortic aneurysm         | 38.3% (173/452)          |
| Aortic dissection       | 0.7% (3/452)             |

148 **eTable 14. The 5 most significant SNVs in the common variants analysis**

| <b>Chromosome</b> | <b>RS Number</b> | <b>Position (GRCh37)</b> | <b>Location to<br/><i>MIB1</i></b> | <b>Mean Allele<br/>Frequency</b> | <b>P-value</b> |
|-------------------|------------------|--------------------------|------------------------------------|----------------------------------|----------------|
| 18                | rs7241299        | 19292517                 | Upstream                           | 9%                               | 0.00283        |
| 18                | rs79023008       | 19323399                 | Intron 2                           | 9%                               | 0.00236        |
| 18                | rs1893384        | 19351344                 | Intron 3                           | 31%                              | 0.00095        |
| 18                | rs3017041        | 19355507                 | Intron 4                           | 31%                              | 0.00366        |
| 18                | rs11083391       | 19447927                 | 3'UTR                              | 9%                               | 0.00401        |

149

150

**Table 15. Risk haplotypes at the MIB1 locus: a comparison between BAV cases and controls**

| <b>index</b> | <b>haplotype</b> | <b>Total freq.</b> | <b>Total S.E</b> | <b>Controls freq.</b> | <b>Controls S.E.</b> | <b>Cases freq.</b> | <b>Cases S.E.</b> |
|--------------|------------------|--------------------|------------------|-----------------------|----------------------|--------------------|-------------------|
| <b>1</b>     | <b>00000</b>     | <b>68%</b>         | <b>0.000358</b>  | <b>69%</b>            | <b>0.000442</b>      | <b>64%</b>         | <b>0.00019</b>    |
| 2            | 00001            | 0%                 | 0                | 0%                    | 0                    | 0%                 | 0                 |
| 3            | 00010            | 1%                 | 0.000339         | 1%                    | 0.000423             | 0%                 | 0.000129          |
| 4            | 00100            | 0%                 | 0.00014          | 0%                    | 0.000174             | 0%                 | 0.000129          |
| <b>5</b>     | <b>00110</b>     | <b>22%</b>         | <b>0.000255</b>  | <b>21%</b>            | <b>0.000319</b>      | <b>24%</b>         | <b>0.000129</b>   |
| 6            | 01000            | 0%                 | 0.000284         | 0%                    | 0.000355             | 0%                 | 0.000141          |
| 7            | 01010            | 0%                 | 0.00028          | 0%                    | 0.000348             | 0%                 | 0                 |
| 8            | 01110            | 0%                 | 0.000061         | 0%                    | 0.000076             | 0%                 | 0                 |
| 9            | 10000            | 0%                 | 0                | 0%                    | 0                    | 0%                 | 0                 |
| 10           | 11011            | 0%                 | 0.000144         | 0%                    | 0.000179             | 0%                 | 0                 |
| 11           | 11101            | 0%                 | 0.000123         | 0%                    | 0.000154             | 0%                 | 0.000003          |
| 12           | 11110            | 0%                 | 0                | 0%                    | 0                    | 0%                 | 0                 |
| <b>13</b>    | <b>11111</b>     | <b>8%</b>          | <b>0.000208</b>  | <b>8%</b>             | <b>0.000259</b>      | <b>11%</b>         | <b>0.000003</b>   |

The table summarizes the estimated sample haplotype frequencies using PHASE. "Total freq": estimated haplotype frequencies for the whole sample; "Total S.E.": estimated standard errors for these frequencies. Additional columns present estimated haplotype frequencies and their standard deviations in cases and controls. Haplotype SNPs are presented in Fig. 3.

**eTable 16. Results from the combination of missense *Mib1* K735R mutant alleles with *Notch1* loss of function mutations**

| <b>Genotypes</b>                                           | <b>TAV</b> | <b>BAV</b> | <b>No VSD</b> | <b>VSD</b> | <b>Total</b> |
|------------------------------------------------------------|------------|------------|---------------|------------|--------------|
| <i>Mib1</i> <sup>+/+</sup> ; <i>Notch1</i> <sup>+/+</sup>  | 4          | 0          | 0             | 0          | 4            |
|                                                            | 100%       | 0%         | 0%            | 0%         | 100%         |
| <i>Mib1</i> <sup>KR/+</sup> ; <i>Notch1</i> <sup>+/+</sup> | 11         | 0          | 11            | 0          | 11           |
|                                                            | 100%       | 0%         | 100%          | 0%         | 100%         |
| <i>Mib1</i> <sup>+/+</sup> ; <i>Notch1</i> <sup>+/-</sup>  | 10         | 1          | 6             | 5          | 11           |
|                                                            | 91%        | 9%         | 55%           | 45%        | 100%         |
| <i>Mib1</i> <sup>KR/+</sup> ; <i>Notch1</i> <sup>+/-</sup> | 5          | 4          | 0             | 9          | 9            |
|                                                            | 56%        | 44%        | 0%            | 100%       | 100%         |

TAV: Tricuspid aortic valve; BAV: Bicuspid aortic valve; VSD: Ventricular septal defect.

eFigure 1: A flow chart summarizing the design of the study

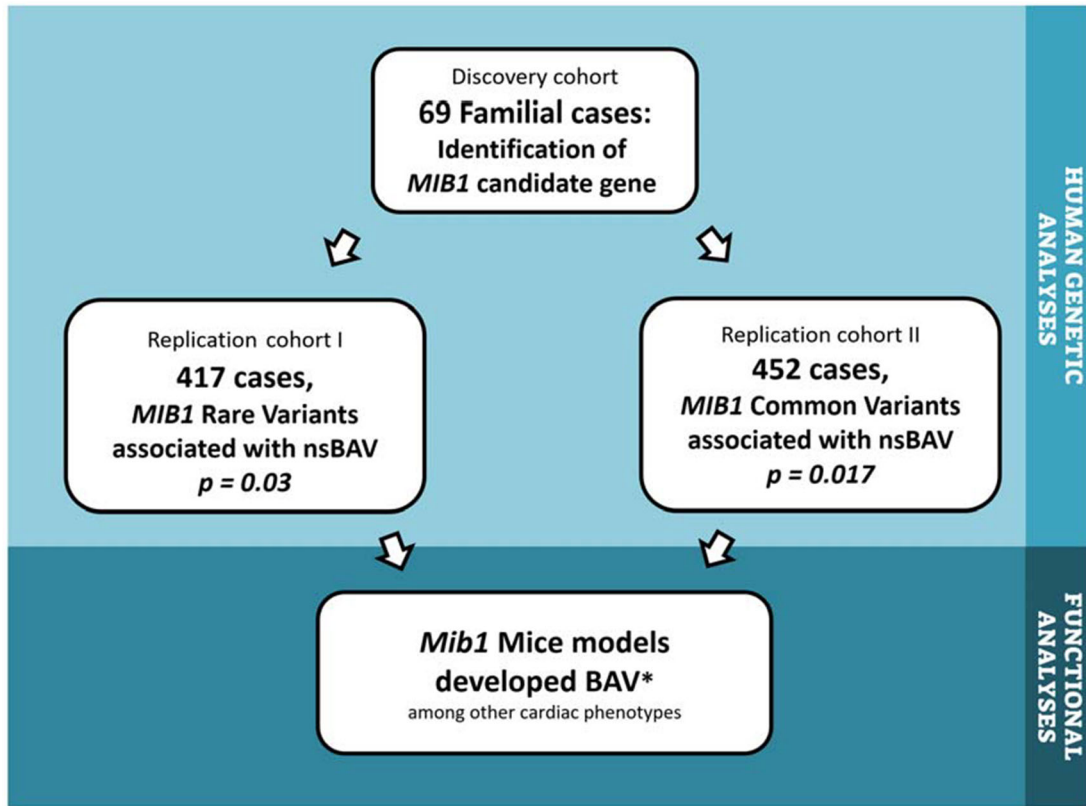

164

The human genetics data sources include a discovery cohort of familial cases and two additional independent cohorts. We validated the association via functional models: *in-vivo* mouse models. \*Mice models of the identified *MIB1* variants in the human cohort on a sensitized background.

169

**Figure 2: Flow chart displaying the prioritization process for candidate genes and variants analysis**

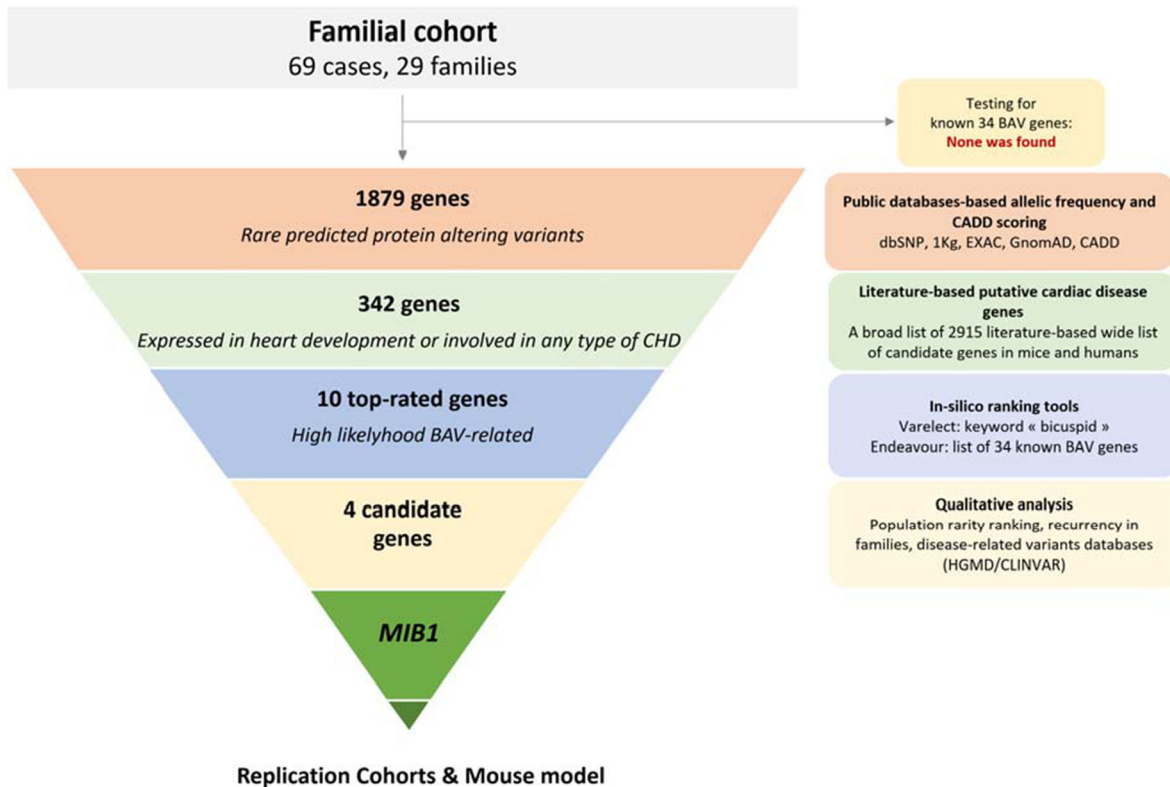

172

(a) 1879 genes with rare variants were selected in our discovery cohort based on variant frequency (MAF < 1%), annotation (missense, canonical splice-site, frameshift, indels and nonsense variants), and predicted pathogenicity (CADD score >20). (b) From literature data, two lists of candidate genes were used, based on their roles in heart development pathophysiology: genes involved in human congenital heart disease (CHD) and genes expressed in the developing mouse heart; (c) Crossing the gene list in a with the list in b resulted, respectively, in 246 and 96 common genes. (d) Gene prioritization tools (VarElect and Endeavour) were used independently to rank these lists of genes. Varelect [keyword was “bicuspid”], and Endeavour training list of genes was the 34 BAV genes involved in humans and mice (Table S12). The top 10 ranked genes from each tool were chosen for further analysis. (e) Subsequent gene lists were analyzed by (1) *Rarity* – ranking variants by lowest allelic frequencies in GnomAD, (2) *Recurrence* – the number of families sharing pathogenic variants in the gene; and (3) *Variant “weight”* – according to the variant type, its known pathogenicity using HGMD and CLINVAR disease databases and the predicted severity of pathogenicity. The overall process yielded four final candidate genes, from which *MIB1* was identified as the leading candidate: in addition to its role in NOTCH pathway, the identified variant that was published as causal in a family of LVNC.

190

191

**eFigure 3: Multidimensional Scaling (MDS) plot for 452 BAV cases and 1911 FHS controls**

Red dots: cases; Blue dots: controls; We identified 77 outliers in the control group that were excluded, therefore, 452 cases and 1834 controls were included for final analysis.

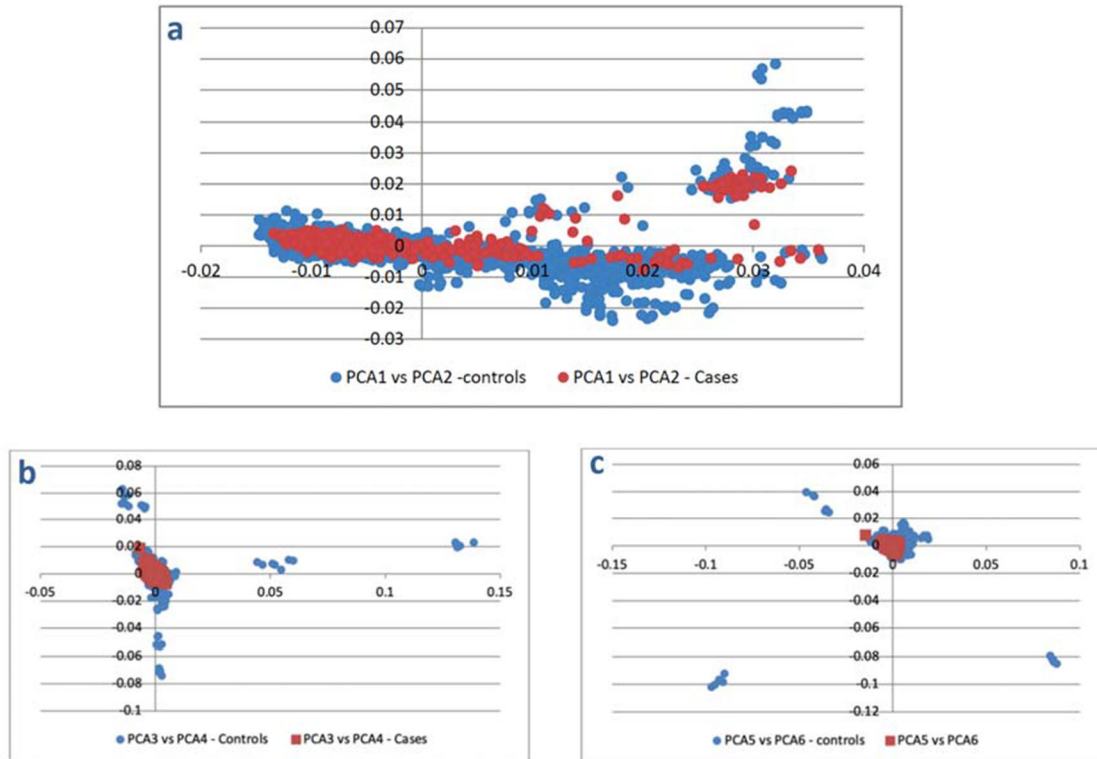

196

Quality control of the genotype data from each cohort was performed using Genome Studio and PLINK. We excluded individuals with low overall call rates, phenotypic and genotypic sex disparity and related individuals. We excluded SNPs with low call rates,  $MAF > 1\%$ , non-autosomal origin,  $HWE\ p\text{-value} < 1.0E-5$  and heterozygote excess.

We performed principal components-based (PCA) filtering for population stratification. We calculated 10 PCAs for the merged data and then used an MDS-plot (multi-dimensional-scale) to identify clusters and outliers. We did not detect any clusters in the merged population. We identified 77 outliers only in the control group and excluded them by using cutoff Eigenvalues (-0.02 to +0.02) on Y axis which calculated by using IBS (identical-by-state) distance for each pair of individuals (Figures 2A, 2B, 2C). No BAV case outliers were identified. An additive logistic regression model was performed for association analysis adjusted for sex and 10 PCA using PLINK.

After merging cases and controls and further quality controls, we used 452 BAV cases and 1834 white controls with a set of 1,355,128 single-nucleotide polymorphisms (SNPs) common to both Illumina arrays. From the 1,355,128 SNPs analyzed after QC for our association analysis, 66 SNPs in MIB1 (uc002ktp.3) hg19 chr18:19,284,918-19,450,912 region +/- 100kb were identified.”

**eFigure 4: Pedigree of family BAV-003 with *MIB1* p.V943F variant and bicuspid aortic valve (BAV) phenotype**

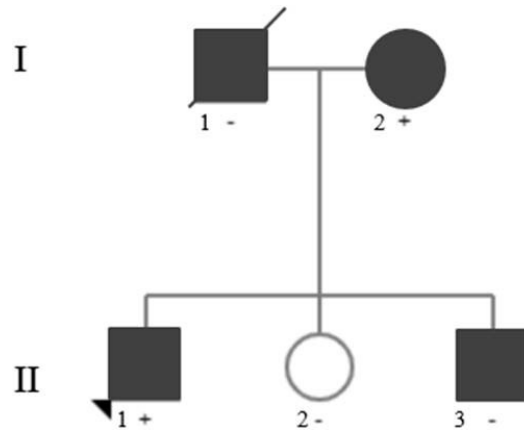

Circles indicate females, squares indicate males. The proband (III-1) is indicated by a black arrowhead. Black filled symbols: bicuspid aortic valve. White filled symbols: tricuspid aortic valve. Genetic status: (+), p.V943F carrier patient; (-), non-carrier patient. In this pedigree, both parents have BAV.



**Figure 5: Histological analysis of *Mib1*<sup>+/+</sup>, *Mib1*<sup>+/+</sup>;*Notch1*<sup>+/+</sup> and *Mib1*<sup>+/+</sup>;*Rbp*<sup>+/+</sup> control mice.** H&E staining. Aortic valves (A,C,E) and heart sections at E16.5. (B,D,F). The asterisk indicates the positions of the leaflets. (G) Quantification of valve defects. Data are expressed as mean ± S.D. *Mib1*<sup>+/+</sup> (n=31); *Mib1*<sup>+/+</sup>; *NI*<sup>+/+</sup> (n=4), *Mib1*<sup>+/+</sup>;*Rbp*<sup>+/+</sup> (n=10), Non-significant differences by Chi-square. Scale bars, 100µm and 200µm.

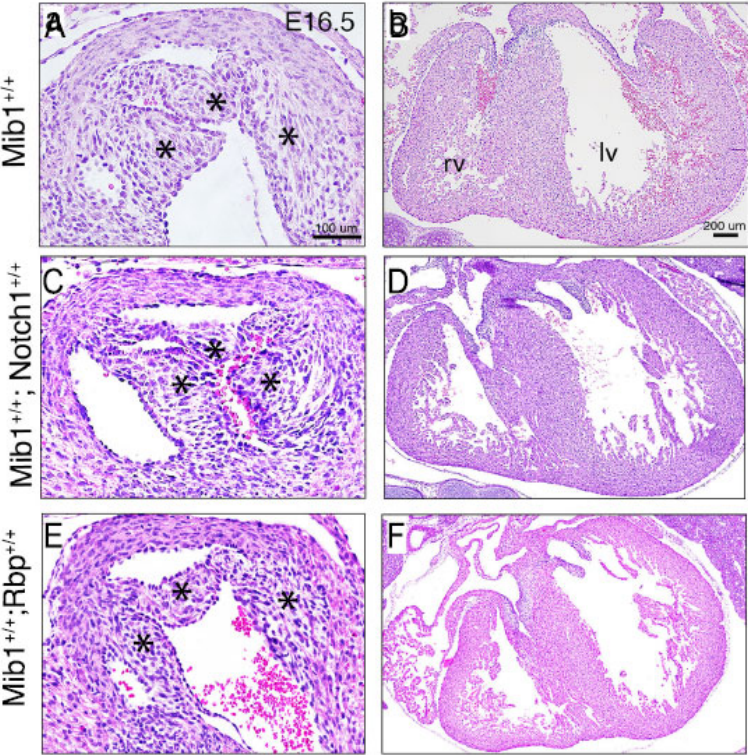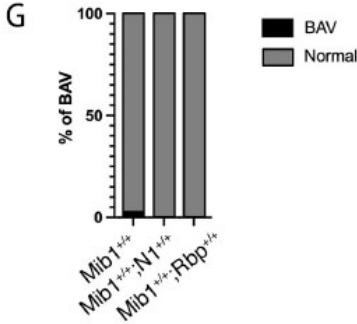

Supplement: jamacardiol-e231469-s001.pdf [file jamacardiol-e231469-s001.pdf]
