# Supplementary material
Source: PubMed Central journal article supplement (PMC10323766)
Supplement: jamacardiol-e231469-s003.pdf [file jamacardiol-e231469-s003.pdf]

## Data Sharing Statement

Tessler. Mice heterozygous for Notch Association of the Novel NOTCH Pathway Regulator MIB1 Gene With the Development of Bicuspid Aortic Valve. *JAMA Cardiol.* Published July 05, 2023. doi:10.1001/jamacardio.2023.1469

### Data

**Data available:** Yes

**Data types:** Deidentified participant data, Data (not involving human participants)

**How to access data:** Suppl. materials

**When available:** With publication

### Supporting Documents

**Document types:** None

### Additional Information

**Who can access the data:** Researchers whose proposed use of the data has been approved

**Types of analyses:** Any purpose

**Mechanisms of data availability:** With a signed data access agreement
